# Supplementary material for: Repurposing Antibacterial AM404 As a Potential Anticancer Drug for Targeting Colorectal Cancer Stem-Like Cells
Source: PubMed Central journal article supplement (PMC7017077; doi:10.3390/cancers12010106), 2019-12-31

# Supplementary material: Repurposing Antibacterial AM404 As a Potential Anticancer Drug for Targeting Colorectal Cancer Stem-Like Cells

Mehreen Ahmed, Nicholas Jinks, Roya Babaei-Jadidi, Hossein Kashfi, Marcos Castellanos-Urbe, Sean T. May, Abhik Mukherjee and Abdolrahman S. Nateri

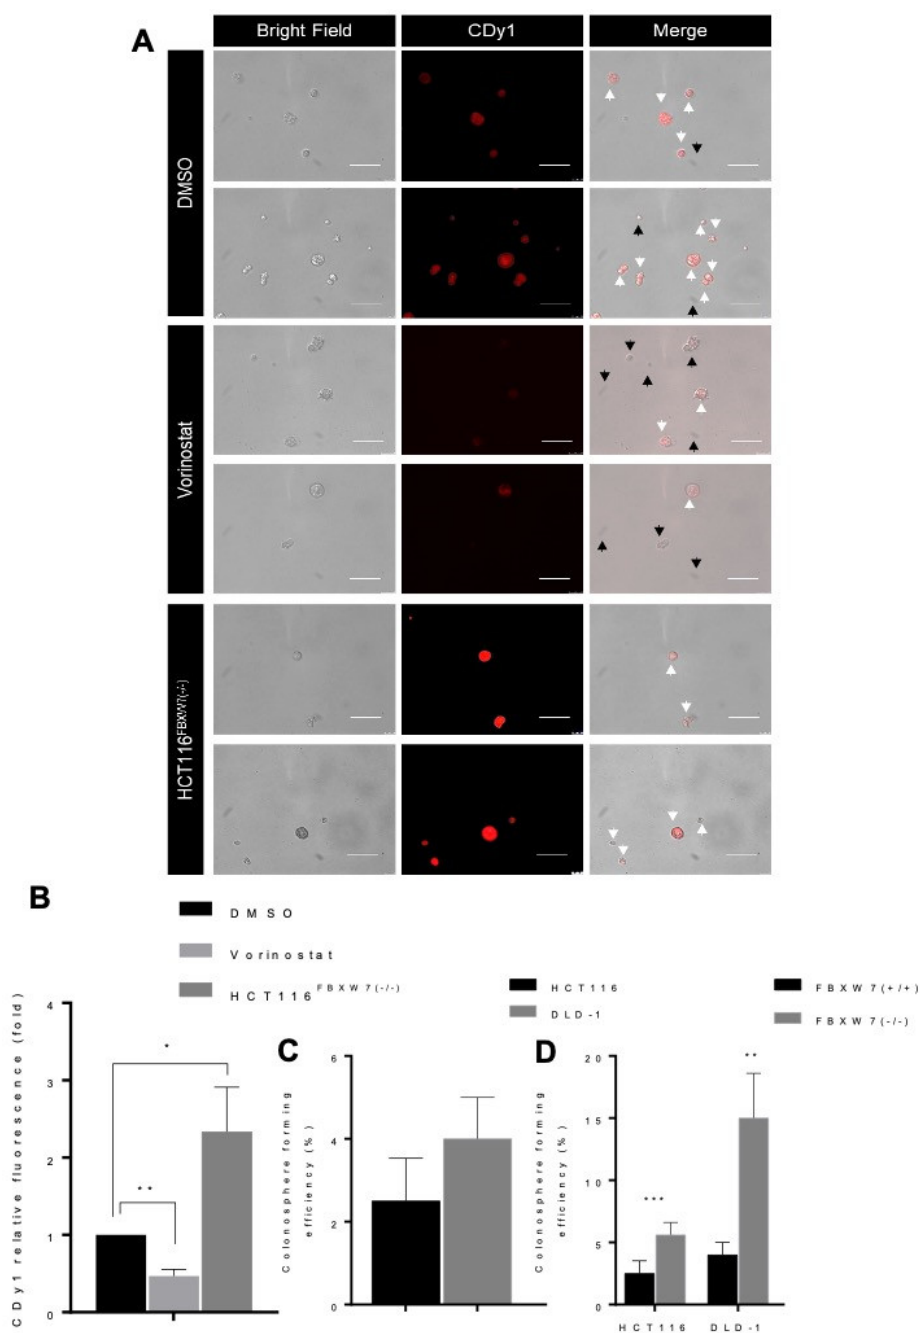

**Figure 1.** A) Vorinostat (SAHA) induces differentiation and FBXW7 deletion indicates attainment of more stemness activity in HCT116 derived colonospheres. CDy1 dye marks the stem-like activity of formed colonospheres. Black arrows show the colonospheres that were not stained with CDy1, indicating loss of their stem-like activity. Whereas, white arrows show the colonospheres with stem-like characteristics. Scale bars: 25  $\mu$ m. B) CDy1 confers reduced fluorescence intensity in Vorinostat

treated colonospheres, possibly due to the drug induced differentiation and greater intensity in HCT116-FBXW7(-/-) cell derived colonospheres indicating higher tumorigenic properties as observed by CDy1 staining. Bars represent mean  $\pm$  SD,  $n = 15$ ; \*  $p < 0.05$ , \*\*  $p < 0.01$ , using Student's  $t$  test. **C)** Quantification of the colonosphere-forming ability of the HCT116 and DLD-1 cell lines. **D)** Quantification of the colonosphere-forming ability of the HCT116 cells  $\pm$  FBXW7 (left) and DLD1 cells  $\pm$  FBXW7 (right). Bars represent the mean of three different experiments  $\pm$  SEM; \*\*  $p < 0.01$ , \*\*\*  $p < 0.001$ , using Student's  $t$  test.

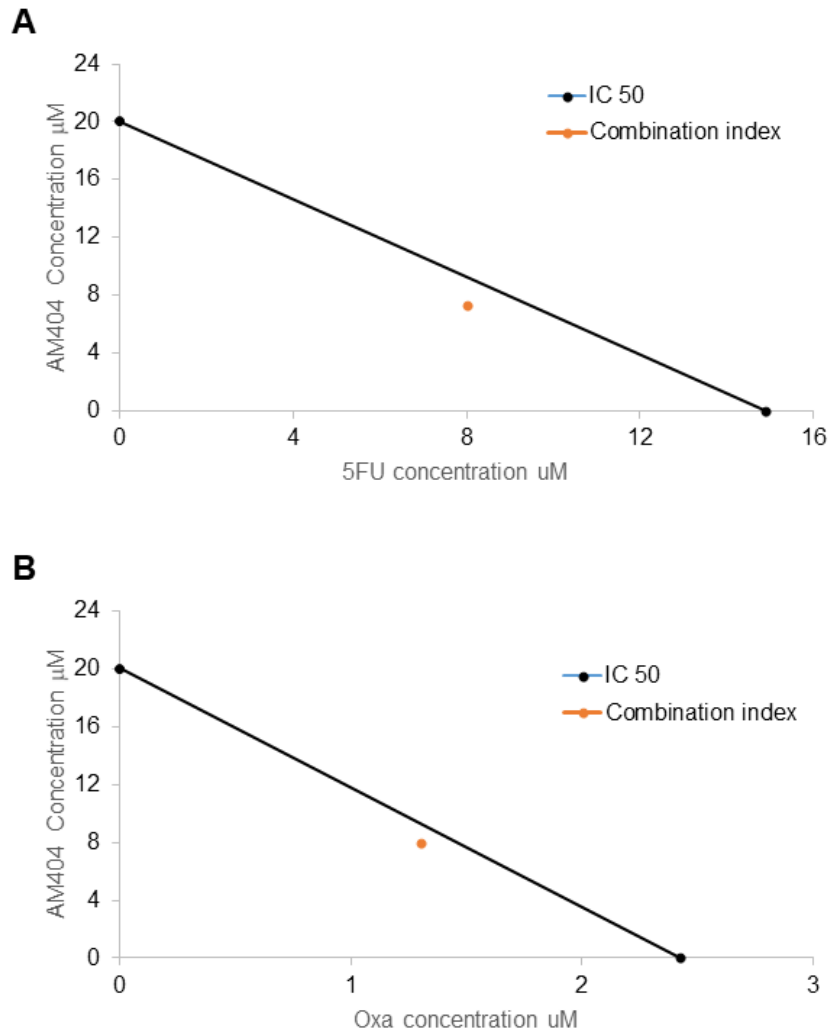

**Figure S2.** Isobologram analysis at the combination effect. **(A)** Combination therapy of AM404 and 5FU with combination index of 0.89. **(B)** Combination therapy of AM404 and Oxa with combination index of 0.94.

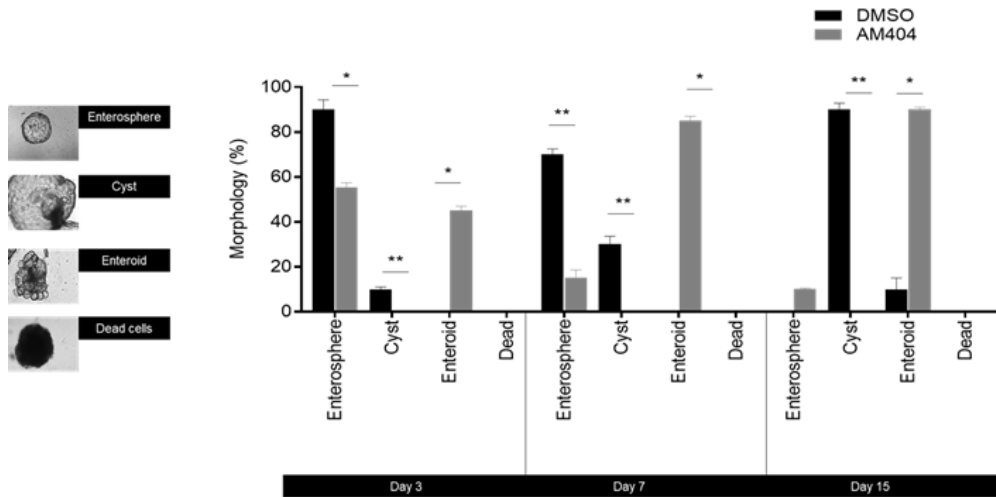

**Figure S3.** AM404 treatment presents enteroid-like structures and induces differentiation in organoids. Percentage of enterosphere, cyst, enteroids and dead cells at day 3, 7 and 15 days of treatment. Bars represent the mean of three different experiments  $\pm$  SEM; \*  $p < 0.05$ , \*\*  $p < 0.01$ , \*\*\*  $p < 0.001$ , using Student's t test.

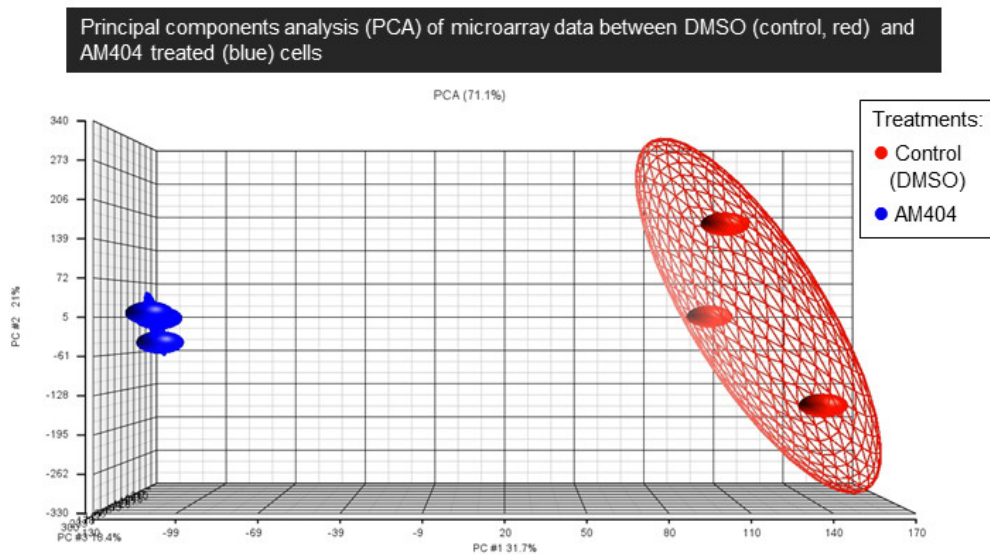

**Figure S4.** Principal components analysis (PCA) of microarray data between DMSO (control, red) and AM404 treated (blue) cells transcriptomes.

**A****Gene ontology (GO) biological pathways**

|                                                                                                                             |
|-----------------------------------------------------------------------------------------------------------------------------|
| Negative regulation of transcription from RNA polymerase II promoter (GO: 0000122)                                          |
| DNA damage induced protein phosphorylation (GO: 0006975)                                                                    |
| DNA repair (GO: 0006281)                                                                                                    |
| Protein ubiquitination involved in ubiquitin-dependent protein catabolic process (GO: 0042787)                              |
| Reduction of transcription involved in G2/M transition of mitotic cell cycle (GO: 0000117)                                  |
| Negative regulation of G2/S transition of mitotic cell cycle by negative regulation of transcription from RNA polymerase II |
| Ciliary basal body plasma membrane docking (GO: 0097711)                                                                    |
| Histone H4 acetylation involved in response to DNA damage stimulus (GO: 20000776)                                           |
| Regulation of transcription involved in G1/S transition of mitotic cell cycle (GO: 0000083)                                 |
| Telomere maintenance in response to DNA damage (GO: 0043247)                                                                |

**B****Genetic and physical interaction network of differentially expressed genes by AM404**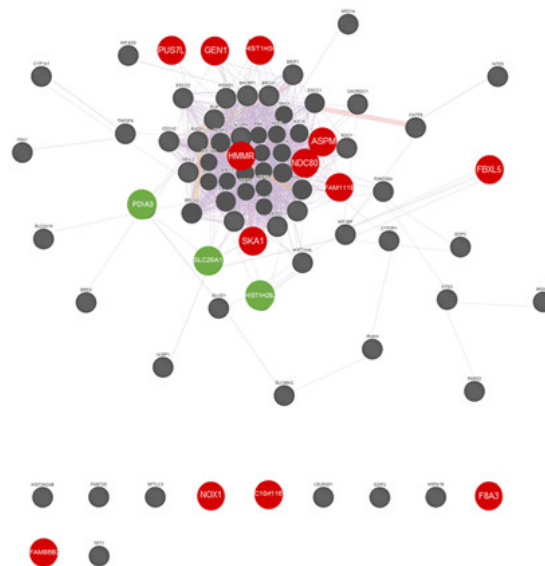

**Figure S5.** (A) Gene Ontology (GO) biological pathways for the 323 genes (mean  $\geq 2$  fold change) that had significantly altered their expression by AM404 treatment. Results were obtained using DAVID Bioinformatics Resources 6.8. (B) Interaction network of 75 differentially expressed genes (mean  $\geq 2.5$  fold change) by AM404 treatment. The GeneMANIA plug-in for Cytoscape was used to generate an interaction network based on previously documented interactions. Red and green nodes mark down- and upregulated 16 genes amongst other genes. .

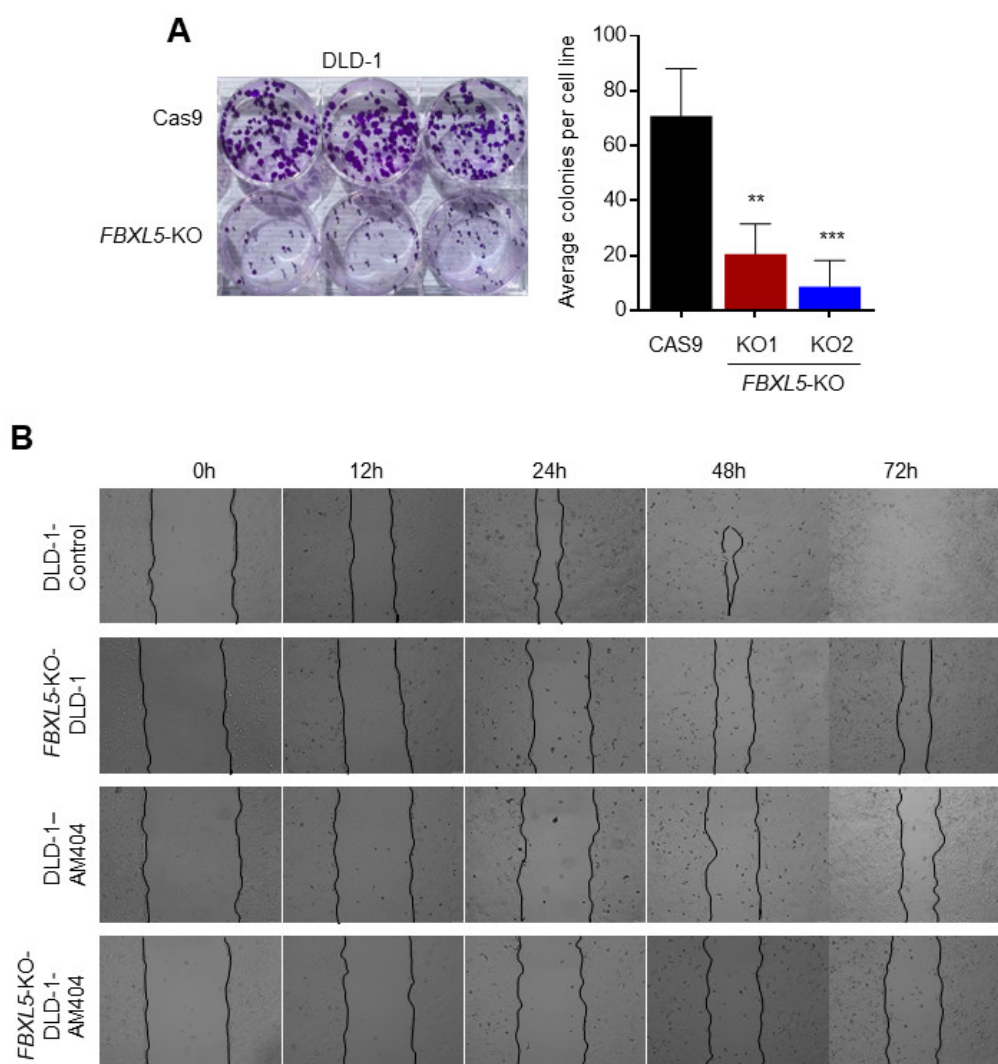

**Figure S6.** (A) Colony forming efficiency assays of DLD-Cas9 (control) and DLD-Cas9:FBXL5-gRNAs (CRISPR-knockout) cell lines (KO1 and KO2). Bars are expressed as mean  $\pm$  S.E.M. ( $n = 3$ ). \*\*,  $p < 0.01$ ; \*\*\*,  $p < 0.001$ . (B) Representative images of wound healing assay of DLD-Cas9 (control) and DLD-Cas9:FBXL5-gRNAs (CRISPR-knockout) cell lines treated with DMSO (control) and AM404 were taken at 0, 12, 24, 48 and 72 hours with phase-contrast microscope for quantification in triplicate samples as shown in Figure. 6E.

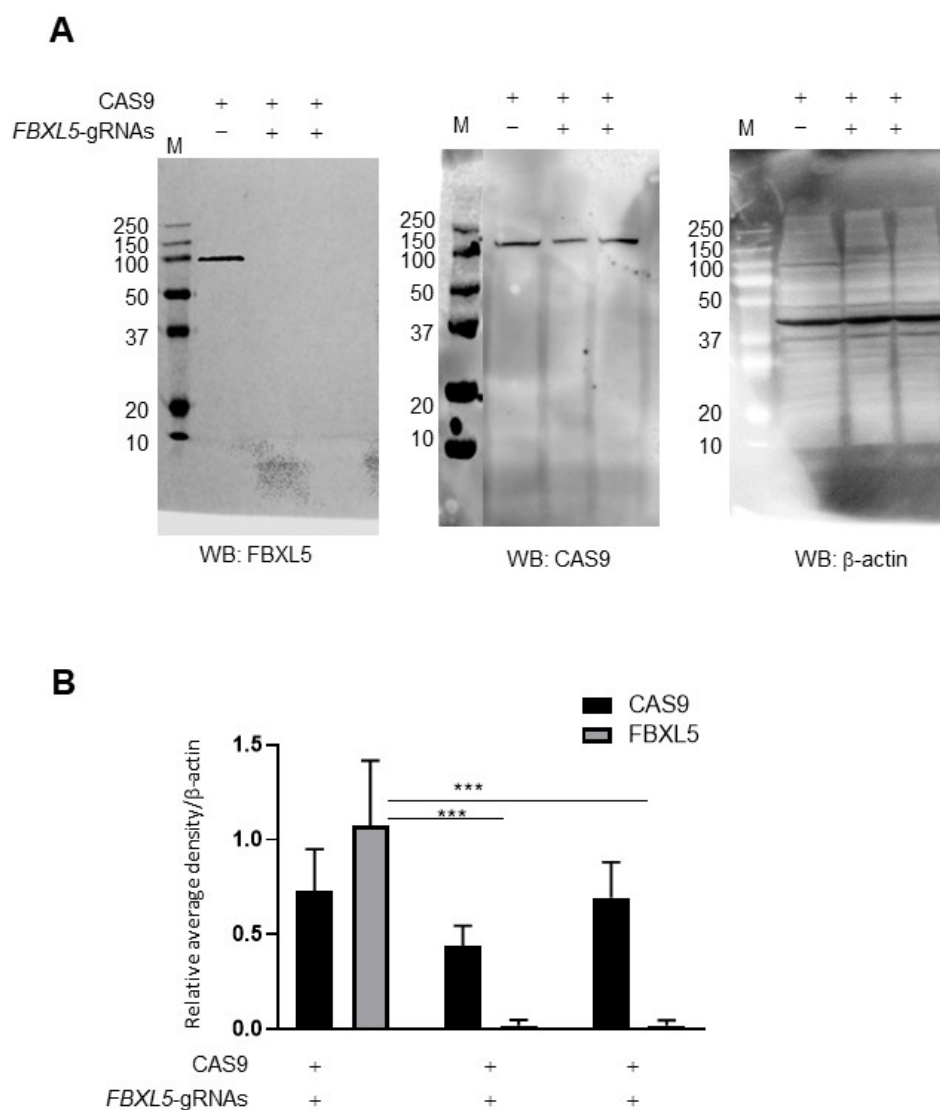

**Figure S7. (A)** Whole western blot images of Figure 6B. **(B)** FBXL5 and Cas9 intensity ratio versus  $\beta$ -actin of each band showed in Figure 6B. Bars represent the mean of three different experiments  $\pm$  SEM; \*\*  $p < 0.01$ , \*\*\*  $p < 0.001$ , using Student's  $t$  test.

**Table S1.** List of primers and their sequences used for qRT-PCR assay.

|       |         |                           |
|-------|---------|---------------------------|
| CD44  | Forward | AGAAGGTGTGGGCAGAAGAA      |
|       | Reverse | AAATGCACCATTTCTGAGA       |
| NANOG | Forward | GCAGGCAACTCACTTTATCCCA    |
|       | Reverse | GGCAGCTTTAAGACTTTTCTGG    |
| LGR5  | Forward | GACAACAGCAGTATGGACG       |
|       | Reverse | GCATTACAAGTAAGTGCCAG      |
| OCT4  | Forward | AAGCTGCGGCCCTTGCTGCAG     |
|       | Reverse | AGCCCAAGCTGCTGGGCGATG     |
| Krt20 | Forward | TGAAGAGCTGCGAAGTCAGAT     |
|       | Reverse | TCCCTCTCAGTCTCATACTTCAGTC |
| CDX2  | Forward | AGCCAAGTGAAAACCAGGAC      |
|       | Reverse | CCAGATTTTAACCTGCCTCTCA    |
| C-Jun | Forward | ACCCCAAGATCCTGAAACAG      |
|       | Reverse | ATCAGGCGCTCCAGCTCG        |
| C-Myc | Forward | GGAGACACCGCCACCA          |
|       | Reverse | GCGCTGCGTAGTTGTGCTG       |

|            |         |                            |
|------------|---------|----------------------------|
| CCND1      | Forward | GCTGGAGGTCTGCGAGGA         |
|            | Reverse | CATCTTAGAGGCCACGAACA       |
| CTNNB1     | Forward | TATTACGACAGACTGCC          |
|            | Reverse | TGAAGTCCTAAAGCTTG          |
| CXCR4      | Forward | TTCTACCCCAATGACTTGTG       |
|            | Reverse | ATGTAGTAAGGCAGCCAACA       |
| BMI-1      | Forward | CCAGGGCTTTTCAAAAATGA       |
|            | Reverse | CCGATCCAATCTGTTCTGGT       |
| N-Cadherin | Forward | GACAATGCCCCTCAAGTGT        |
|            | Reverse | CCATTAAGCCGAGTGATGGT       |
| Vimentin   | Forward | GAGAACTTTGCCGTTGAAGC       |
|            | Reverse | TCCAGCAGCTTCCTGTAGGT       |
| FBXW7      | Forward | GAGACTTCATCTCCTTGCTTCCTAAA |
|            | Reverse | CGCTTGACAGCAGGTCTTTG       |
| B-actin    | Forward | GCGCGGCTACAGCTTCA          |
|            | Reverse | CTTAATGTCACGCACGATTCC      |

Table S2. List of drugs selected during different stages of the screening.

| Primary Screening<br>(50 drugs) | Re-screening                |                     |                     | Common<br>Compounds<br>(11 Drugs) |
|---------------------------------|-----------------------------|---------------------|---------------------|-----------------------------------|
|                                 | HCT116<br>(16 Drugs)        | DLD-1<br>(11 Drugs) | SW480<br>(11 Drugs) |                                   |
| 3,5,3'-Triiodothyronine         |                             |                     |                     |                                   |
| 5-Nonyloxytryptamine<br>HCl     |                             |                     |                     |                                   |
| Acitretin                       |                             |                     |                     |                                   |
| AM 404                          |                             |                     |                     |                                   |
| Benidipine HCl                  |                             |                     |                     |                                   |
| Bifemelane HCl                  |                             |                     |                     |                                   |
| Calcitriol                      |                             |                     |                     |                                   |
| CGS 15943                       |                             |                     |                     |                                   |
| Chloroxine                      |                             |                     |                     |                                   |
| (+)-cis-Diltiazem HCl           | 5-Nonyloxytryptamine<br>HCl | AM 404              |                     |                                   |
| Clofazimine                     | AM 404                      | Daunorubicin        |                     |                                   |
| Dactinomycin                    | Epirubicin HCl              | HCl                 | AM 404              | AM 404                            |
| Daunorubicin HCl                | Dactinomycin                | Doxorubicin         | Daunorubicin HCl    | Daunorubicin HCl                  |
| Doxorubicin HCl                 | Daunorubicin HCl            | HCl                 | Doxorubicin HCl     | Epirubicin HCl                    |
| Ebselen                         | Doxorubicin HCl             | Epirubicin HCl      | Epirubicin HCl      | Hexachlorophene                   |
| Efavirenz                       | Hexachlorophene             | Hexachlorophene     | Hexachlorophene     | Honokiol                          |
| Epigallocatechin gallate        | Honokiol                    | ne                  | Honokiol            | Honokiol                          |
| Epirubicin HCl                  | Idarubicin HCl              | Honokiol            | Idarubicin HCl      | Idarubicin HCl                    |
| Fenoldopam mesylate             | MK 886                      | Honokiol            | Itraconazole        | Itraconazole                      |
| Galanthamine HBr                | Mitoxantrone HCl            | Idarubicin HCl      | MK 886              | MK 886                            |
| Hexachlorophene                 | Oligomycin A                | Itraconazole        | Rifabutin           | Rifabutin                         |
| Honokiol                        | Rifabutin                   | MK 886              | Rifabutin           | Rifapentine                       |
| Icariin                         | Rifampicin                  | Rifabutin           | Rifapentine         |                                   |
| Idarubicin HCl                  | Rifapentine                 | Rifapentine         |                     |                                   |
| Idebenone                       | Zafirlukast                 |                     |                     |                                   |
| Lacidipine                      |                             |                     |                     |                                   |
| Methyldopa                      |                             |                     |                     |                                   |
| MK 886                          |                             |                     |                     |                                   |
| Mitoxantrone HCl                |                             |                     |                     |                                   |
| Nicotinamide                    |                             |                     |                     |                                   |
| Nisoldipine                     |                             |                     |                     |                                   |
| Oligomycin A                    |                             |                     |                     |                                   |
| Oxytetracycline HCl             |                             |                     |                     |                                   |
| PD 81723                        |                             |                     |                     |                                   |
| Pefloxacin mesylate             |                             |                     |                     |                                   |

---

Phylloquinone  
 Pyrazinamide  
 Raloxifene HCl  
 Rifabutin  
 Rifampicin  
 Rifapentine  
 Rolitetracycline  
 Symmetrel  
 Taxifolin-(+/-)  
 Tolterodine tartrate  
 Trans-Retinoic acid  
 Tremulacin  
 Trimebutine maleate  
 Vinorelbine tartrate  
 Zafirlukast

---

**Table S3.** List of differentially expressed genes (mean  $\geq 2$  fold change) in AM404 treated colonospheres.

| Gene Symbol        | Fold-Change |
|--------------------|-------------|
| SLC20A1            | 3.40922     |
| SNORA31            | 3.23582     |
| SNORA28            | 3.13565     |
| MIR3115            | 3.11244     |
| HIST1H2BJ          | 3.09949     |
| MIR637             | 2.80158     |
| SPDYA              | 2.77065     |
| TNFSF9             | 2.74608     |
| CHORDC1            | 2.71431     |
| SNORD59B           | 2.68054     |
| TPT1               | 2.67106     |
| OTTHUMG00000165727 | 2.57599     |
| BRD2               | 2.5751      |
| GLUD1              | 2.54969     |
| MIR3662            | 2.54056     |
| HSPA1B             | 2.53474     |
| HIST2H2BE          | 2.40498     |
| BHLHE40            | 2.40393     |
| FDPS               | 2.38535     |
| HSPA1B             | 2.36471     |
| SNORA10            | 2.35812     |
| HSPA1B             | 2.35085     |
| MPZL3              | 2.3379      |
| IL8                | 2.32806     |
| HSPA1A             | 2.32556     |
| SNORD51            | 2.32159     |
| CTGF               | 2.30568     |
| HSPA1B             | 2.29133     |
| KLF6               | 2.27076     |
| HMGCS1             | 2.26364     |
| LOC100129785       | 2.26142     |
| TSC22D3            | 2.26104     |
| LOC100506766       | 2.25716     |
| OTTHUMG00000171211 | 2.24005     |
| PPP1R2             | 2.22361     |
| HSPA1A             | 2.19472     |
| LOC554174          | 2.1828      |



|                    |          |
|--------------------|----------|
| ZBTB40-IT1         | 2.16383  |
| TMEM55B            | 2.14921  |
| MAFG               | 2.14053  |
| PRPF39             | 2.12726  |
| PER1               | 2.11071  |
| INSIG1             | 2.09923  |
| ZBTB34             | 2.08724  |
| ECM1               | 2.067    |
| MIR3143            | 2.05838  |
| ADM                | 2.05594  |
| GRHL1              | 2.05407  |
| JUN                | 2.05354  |
| MVD                | 2.05347  |
| CLK1               | 2.05199  |
| HIST1H4B           | 2.04491  |
| SNORD58A           | 2.03921  |
| RNF39              | 2.03291  |
| YOD1               | 2.02659  |
| ARL14              | 2.02412  |
| NR4A2              | 2.02206  |
| CDKN1C             | 2.01733  |
| LRCH4              | 2.0168   |
| RPLP1              | 2.01204  |
| OTTHUMG00000154962 | 2.00453  |
| FANCD2             | -2.00047 |
| ACADM              | -2.00231 |
| OMA1               | -2.00622 |
| IRAK1BP1           | -2.00897 |
| FASTKD3            | -2.01007 |
| CCP110             | -2.01069 |
| NCAPG              | -2.01211 |
| LAMP3              | -2.01324 |
| SEPHS2             | -2.01373 |
| MLF1IP             | -2.01385 |
| CCDC71             | -2.01528 |
| KIF20A             | -2.01628 |
| HENMT1             | -2.01765 |
| SNORD72            | -2.01799 |
| H2AFY2             | -2.01904 |
| ADAT1              | -2.01967 |
| SULT1C2            | -2.02463 |
| TIRAP              | -2.02682 |
| C12orf66           | -2.0271  |
| MINA               | -2.02816 |
| UBLCP1             | -2.0351  |
| ZNF594             | -2.03544 |
| RFC5               | -2.03811 |
| DSCC1              | -2.03918 |
| UEVLD              | -2.03929 |
| KLK10              | -2.03937 |
| CEP19              | -2.04253 |
| ID3                | -2.04304 |
| DHODH              | -2.04324 |
| FECH               | -2.04569 |
| SELRC1             | -2.0464  |
| YEATS4             | -2.04749 |

|              |          |
|--------------|----------|
| TTC26        | -2.04789 |
| SFXN2        | -2.05314 |
| TRIM32       | -2.0533  |
| DLAT         | -2.05431 |
| FAM114A2     | -2.05534 |
| DSTNP2       | -2.05573 |
| GPR1         | -2.0561  |
| FJX1         | -2.05917 |
| BUB1         | -2.06027 |
| LOC100129502 | -2.06418 |
| SKAP1        | -2.06454 |
| GSG2         | -2.06499 |
| KIAA0586     | -2.06713 |
| USP13        | -2.06889 |
| POLI         | -2.06894 |
| KIAA1107     | -2.07024 |
| DCLRE1A      | -2.07025 |
| HCG15        | -2.07153 |
| ERAL1        | -2.07185 |
| PLK4         | -2.07297 |
| CABYR        | -2.07395 |
| AASDHPPT     | -2.07559 |
| LOC100507449 | -2.07571 |
| KLHL4        | -2.07778 |
| CCDC113      | -2.07969 |
| RBL1         | -2.08169 |
| ASF1B        | -2.0852  |
| SKA3         | -2.10319 |
| TICRR        | -2.10426 |
| WDR92        | -2.1047  |
| FXYD3        | -2.10478 |
| SYK          | -2.10558 |
| TBCK         | -2.10995 |
| RPGRIPL      | -2.11011 |
| HAUS1        | -2.11344 |
| TRMT61B      | -2.11432 |
| CENPK        | -2.11466 |
| DNAJC11      | -2.12161 |
| TRMT1L       | -2.1234  |
| CASP6        | -2.12733 |
| SNORD111     | -2.13249 |
| OSGEPL1      | -2.13254 |
| TMEM9B-AS1   | -2.13855 |
| SNORD100     | -2.1433  |
| CDK1         | -2.14947 |
| FAM173B      | -2.15377 |
| THEM4        | -2.15445 |
| ASCL2        | -2.15581 |
| SIRT5        | -2.15946 |
| ZMYND11      | -2.16142 |
| MBLAC2       | -2.16328 |
| IGFL4        | -2.16683 |
| MRPL15       | -2.16767 |
| KLHDC1       | -2.16798 |
| FARSB        | -2.16817 |
| NMRK1        | -2.17103 |

|              |          |
|--------------|----------|
| DYNC2LI1     | -2.1717  |
| PIGV         | -2.17174 |
| ZNF280B      | -2.18593 |
| SLC25A10     | -2.19245 |
| C2orf43      | -2.19248 |
| PRSS35       | -2.20022 |
| ERCC4        | -2.20079 |
| MOCOS        | -2.20219 |
| CPT2         | -2.204   |
| PNPO         | -2.20535 |
| SLC16A13     | -2.21061 |
| ANKEF1       | -2.21115 |
| GTF2H3       | -2.21185 |
| TRIP11       | -2.21495 |
| KIF23        | -2.2182  |
| TST          | -2.22501 |
| ZFP69        | -2.22759 |
| COX10-AS1    | -2.22822 |
| PLK1         | -2.22996 |
| C6orf70      | -2.23309 |
| C5orf63      | -2.23424 |
| ZNF266       | -2.23441 |
| RRS1         | -2.2374  |
| C4orf32      | -2.2399  |
| KIAA1524     | -2.24724 |
| DET1         | -2.24786 |
| RMI1         | -2.25043 |
| CDX2         | -2.25241 |
| SCRN3        | -2.25434 |
| PLA2G7       | -2.25701 |
| PRMT3        | -2.25733 |
| LOC100506963 | -2.25794 |
| SBSPON       | -2.26796 |
| SNORD9       | -2.26939 |
| C6orf203     | -2.26952 |
| POLQ         | -2.27153 |
| ZNF554       | -2.27756 |
| PPIL1        | -2.28812 |
| KRCC1        | -2.28819 |
| MRM1         | -2.28824 |
| NARG2        | -2.29049 |
| LCN2         | -2.29312 |
| THAP10       | -2.29872 |
| CETN3        | -2.29988 |
| MCM10        | -2.30303 |
| HJURP        | -2.30314 |
| OBSCN        | -2.30829 |
| HSD17B1      | -2.30857 |
| LOC202181    | -2.30882 |
| PMS2         | -2.31583 |
| SRBD1        | -2.31753 |
| KIF11        | -2.31855 |
| XRCC2        | -2.31985 |
| RBM45        | -2.32138 |
| ZBED3        | -2.32373 |
| CCDC125      | -2.32511 |

|                    |          |
|--------------------|----------|
| SLC9A8             | -2.32792 |
| TMEM52B            | -2.3406  |
| CKAP2L             | -2.34853 |
| GTF2IRD2           | -2.35277 |
| LOC100507516       | -2.35412 |
| KIAA1377           | -2.35468 |
| FAM83D             | -2.35958 |
| MARS2              | -2.36325 |
| NCOA5              | -2.36498 |
| TSEN2              | -2.36718 |
| KIF20B             | -2.37419 |
| FKTN               | -2.3758  |
| SDAD1              | -2.3768  |
| SNORD126           | -2.37717 |
| STRADA             | -2.38501 |
| IFT80              | -2.38685 |
| FAM86DP            | -2.38812 |
| LYRM7              | -2.38851 |
| CHAF1B             | -2.39505 |
| OTTHUMG00000059903 | -2.39824 |
| PRIM1              | -2.39825 |
| PSMD5-AS1          | -2.40089 |
| SNORD69            | -2.40203 |
| CSRP2BP            | -2.40465 |
| BRCA2              | -2.40876 |
| CFTR               | -2.41427 |
| GEMIN4             | -2.41471 |
| CENPF              | -2.42261 |
| ZFP90              | -2.42381 |
| RWDD2B             | -2.4249  |
| MGME1              | -2.42706 |
| SYCE2              | -2.44092 |
| C12orf4            | -2.44353 |
| OTTHUMG00000037424 | -2.44592 |
| FLJ14186           | -2.44863 |
| ZNF252P            | -2.4538  |
| ACER2              | -2.45416 |
| CDC25C             | -2.45885 |
| PTCD2              | -2.46617 |
| ABO                | -2.46676 |
| GINS1              | -2.46788 |
| ZNF23              | -2.47319 |
| CES2               | -2.48362 |
| CLUAP1             | -2.48464 |
| USP40              | -2.49191 |
| RNF170             | -2.49736 |
| WDR76              | -2.49784 |
| CYP2R1             | -2.5001  |
| LDLRAD1            | -2.51564 |
| SLC2A10            | -2.52026 |
| SHCBP1             | -2.5219  |
| MGAT2              | -2.53704 |
| CDC7               | -2.57597 |
| NEIL3              | -2.57773 |
| BRCA1              | -2.58799 |
| KIAA1279           | -2.58836 |

|                    |          |
|--------------------|----------|
| FAM72D             | -2.60089 |
| FAM86HP            | -2.60142 |
| NCAPH              | -2.61352 |
| MIF4GD             | -2.61989 |
| WDHD1              | -2.6237  |
| SGOL1              | -2.63519 |
| GOPC               | -2.65037 |
| PARS2              | -2.65689 |
| BLM                | -2.67003 |
| FAM208A            | -2.67272 |
| F8A1               | -2.68143 |
| SNORD121A          | -2.69081 |
| CYP1A1             | -2.69622 |
| RAD51              | -2.73685 |
| SLC46A3            | -2.7375  |
| CHTF8              | -2.74581 |
| ESCO2              | -2.74641 |
| DZIP3              | -2.74818 |
| SPTLC3             | -2.76889 |
| IRAK4              | -2.77648 |
| DTD2               | -2.78523 |
| SNORD90            | -2.79634 |
| OTTHUMG00000163993 | -2.80351 |
| SNORD63            | -2.81223 |
| DTL                | -2.81506 |
| CDCA2              | -2.85031 |
| HIST1H4L           | -2.85568 |
| LINC00858          | -2.87467 |
| HIST2H2AB          | -2.88008 |
| DEPDC1             | -2.94581 |
| INTS5              | -2.94694 |
| ULBP1              | -2.99393 |
| F8A3               | -2.99583 |
| BRIP1              | -2.99929 |
| FBXL5              | -3.0001  |
| FAM111B            | -3.06187 |
| HMMR               | -3.06684 |
| NOX1               | -3.09866 |
| PDIA3              | -3.20377 |
| FAM86B2            | -3.22522 |
| F8A3               | -3.26485 |
| MIR1184-1          | -3.26485 |
| C1orf116           | -3.41795 |
| ASPM               | -3.44786 |
| SKA1               | -3.45407 |
| NDC80              | -3.46322 |
| PUS7L              | -3.50814 |
| SNORA2A            | -3.6422  |
| GEN1               | -3.64797 |
| HIST1H3I           | -3.89911 |

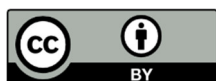

Supplement: cancers-12-00106-s001.pdf [file cancers-12-00106-s001.pdf]
